# Supplementary material for: Gestational age and hospital admissions during childhood: population based, record linkage study in England (TIGAR study)
Source: HighWire-hosted journal article supplement (doi:10.1136/bmj.m4075), 2020-11-25
Supplement: coav055130.ww1.pdf [file coav055130.ww1.pdf]

## **ICD10 codes: categories of admission**

### **Infection**

A02.1 Salmonella sepsis  
A17.0 Tuberculous meningitis  
A17.1 Meningeal tuberculoma  
A17.8 Other tuberculosis of nervous system  
A17.9 Tuberculosis of nervous system, unspecified  
A18.0 Tuberculosis of bones and joints  
A19.0 Acute miliary tuberculosis of a single specified site  
A19.1 Acute miliary tuberculosis of multiple sites  
A20.3 Plague meningitis  
A20.7 Septicemic plague  
A21.7 Generalized tularaemia  
A22.7 Anthrax sepsis  
A23.0 Brucellosis due to *Brucella melitensis*  
A23.1 Brucellosis due to *Brucella abortus*  
A23.2 Brucellosis due to *Brucella suis*  
A23.3 Brucellosis due to *Brucella canis*  
A23.8 Other brucellosis  
A23.9 Brucellosis, unspecified  
A24.1 Acute and fulminating melioidosis  
A25.0 Spirillosis  
A25.1 Streptobacillosis  
A25.9 Rat-bite fever, unspecified  
A32.1 Listerial meningitis and meningoen­cephalitis  
A32.7 Listerial sepsis  
A39.0 Meningococcal meningitis  
A39.1 Waterhouse-Friderichsen syndrome  
A39.2 Acute meningococcaemia  
A39.3 Chronic meningococcaemia  
A39.4 Meningococemia, unspecified  
A39.5 Meningococcal heart disease  
A39.8 Other meningococcal infections  
A39.8Other meningococcal infections  
A39.9 Meningococcal infection, unspecified  
A40.0 Sepsis due to streptococcus, group A  
A40.1 Sepsis due to streptococcus, group B  
A40.2 Sepsis due to streptococcus, group D  
A40.3 Sepsis due to *Streptococcus pneumoniae*  
A40.8 Other streptococcal sepsis  
A40.9 Streptococcal sepsis, unspecified  
A41.0 Sepsis due to *Staphylococcus aureus*  
A41.1 Sepsis due to other specified staphylococcus  
A41.2 Sepsis due to unspecified staphylococcus  
A41.3 Sepsis due to *Hemophilus influenzae*  
A41.4 Sepsis due to anaerobes  
A41.51 Sepsis due to *Escherichia coli* [E. Coli]  
A41.52 Sepsis due to *Pseudomonas*  
A41.58 Sepsis due to other Gram-negative organisms  
A41.8 Other specified septicaemia  
A41.9 Sepsis, unspecified  
A44.0 Systemic bartonellosis  
A48.3 Toxic shock syndrome

A52.0 Cardiovascular syphilis  
A52.1 Symptomatic neurosyphilis  
A52.1 (no description found)  
A52.2 Asymptomatic neurosyphilis  
A52.3 Neurosyphilis, unspecified  
A52.7 Other symptomatic late syphilis  
A52.7 (no description found)  
A52.8 Late syphilis, latent  
A65 Nonvenereal syphilis  
A74.0 Chlamydial conjunctivitis  
A74.8 Other chlamydial diseases  
A78 Q fever  
A79.0 Trench fever  
A79.1 Rickettsialpox due to Rickettsia akari  
A79.8 Other specified rickettsioses  
A79.9 Rickettsiosis, unspecified  
B95.1 Streptococcus, group B, as the cause of diseases classified elsewhere  
G00.0 Haemophilus meningitis  
G00.1 Pneumococcal meningitis  
G00.1 (no description found)  
G00.2 Streptococcal meningitis  
G00.3 Staphylococcal meningitis  
G00.8 Other bacterial meningitis  
G00.9 Bacterial meningitis, unspecified  
G01 Meningitis in bacterial diseases classified elsewhere  
G03.1 Chronic meningitis  
G05.0 Encephalitis, myelitis and encephalomyelitis in bacterial diseases classified elsewhere  
G06.0 Intracranial abscess and granuloma  
G06.1 Intraspinal abscess and granuloma  
G06.2 Extradural and subdural abscess, unspecified  
G07 Intracranial and intraspinal abscess and granuloma in disease classified elsewhere  
I30.1 Infective pericarditis  
I32.0 Pericarditis in bacterial diseases classified elsewhere  
I33.0 Acute and subacute infective endocarditis  
I41.0 Myocarditis in bacterial diseases classified elsewhere  
J39.0 Retropharyngeal and parapharyngeal abscess  
J39.1 Other abscess of pharynx  
J85.3 Abscess of mediastinum  
M00.90 Pyogenic arthritis, unspecified, multiple sites  
M00.91 Pyogenic arthritis, unspecified, shoulder region  
M00.92 Pyogenic arthritis, unspecified, upper arm  
M00.93 Pyogenic arthritis, unspecified, forearm  
M00.94 Pyogenic arthritis, unspecified, hand  
M00.95 Pyogenic arthritis, unspecified, pelvic region and thigh  
M00.96 Pyogenic arthritis, unspecified, lower leg  
M00.97 Pyogenic arthritis, unspecified, ankle and foot  
M00.98 Pyogenic arthritis, unspecified, other site  
M00.99 Pyogenic arthritis, unspecified, site unspecified  
M01.0 Meningococcal arthritis  
M01.1 Tuberculous arthritis  
M46.2 Osteomyelitis of vertebra  
M46.3 Infection of intervertebral disc (pyogenic)  
M46.4 Discitis, unspecified  
M46.5 Other infective spondylopathies

M49.0 Tuberculosis of spine  
M49.1 Brucella spondylitis  
M49.2 Enterobacterial spondylitis  
M49.3 Spondylopathy in other infectious and parasitic diseases classified elsewhere  
M72.6 Necrotizing fasciitis  
M73.0 Gonococcal bursitis  
M73.1 Syphilitic bursitis  
M86.0 Acute haematogenous osteomyelitis  
M86.10 Other acute osteomyelitis, unspecified site  
M86.11 Other acute osteomyelitis, shoulder region  
M86.12 Other acute osteomyelitis, upper arm  
M86.13 Other acute osteomyelitis, forearm  
M86.14 Other acute osteomyelitis, hand  
M86.15 Other acute osteomyelitis, pelvic region and thigh  
M86.16 Other acute osteomyelitis, lower leg  
M86.17 Other acute osteomyelitis, ankle and foot  
M86.18 Other acute osteomyelitis, other site  
M86.19 Other acute osteomyelitis, multiple sites  
M86.2 Subacute osteomyelitis  
M86.4 Chronic osteomyelitis with draining sinus  
M86.5 Other chronic osteomyelitis  
M86.60 Other chronic osteomyelitis, unspecified site  
M86.67 Other chronic osteomyelitis, ankle and foot  
M86.68 Other chronic osteomyelitis, other site  
M86.69 Other chronic osteomyelitis, multiple sites  
M86.8 Other osteomyelitis  
M86.90 Unspecified osteomyelitis, multiple sites  
M86.91 Unspecified osteomyelitis, shoulder region  
M86.92 Unspecified osteomyelitis, upper arm  
M86.93 Unspecified osteomyelitis, forearm  
M86.94 Unspecified osteomyelitis, hand  
M86.95 Unspecified osteomyelitis, pelvic region and thigh  
M86.96 Unspecified osteomyelitis, lower leg  
M86.97 Unspecified osteomyelitis, ankle and foot  
M86.98 Unspecified osteomyelitis, other site  
M86.99 Unspecified osteomyelitis, site unspecified  
M90.0 Tuberculosis of bone  
P36.0 Sepsis of newborn due to streptococcus, group B  
P36.1 Sepsis of newborn due to other and unspecified streptococci  
P36.2 Sepsis of newborn due to Staphylococcus aureus  
P36.3 Sepsis of newborn due to other and unspecified staphylococci  
P36.4 Sepsis of newborn due to Escherichia coli  
P36.5 Sepsis of newborn due to anaerobes  
P36.8 Other bacterial sepsis of newborn  
P36.9 Bacterial sepsis of newborn, unspecified  
P37.0 Congenital tuberculosis  
P37.2 Neonatal (disseminated) listeriosis  
  
A00.0 Cholera due to Vibrio cholerae 01, biovar cholerae  
A00.1 Cholera due to Vibrio cholerae 01, biovar eltor  
A00.9 Cholera, unspecified  
A01.0 Typhoid fever  
A01.1 Paratyphoid fever A  
A01.2 Paratyphoid fever B

A01.3 Paratyphoid fever C  
A01.4 Paratyphoid fever, unspecified  
A02.0 Salmonella enteritis  
A02.2 Localised salmonella infections  
A02.8 Other specified salmonella infections  
A02.9 Salmonella infection, unspecified  
A03.0 Shigellosis due to *Shigella dysenteriae*  
A03.1 Shigellosis due to *Shigella flexneri*  
A03.2 Shigellosis due to *Shigella boydii*  
A03.3 Shigellosis due to *Shigella sonnei*  
A03.8 Other shigellosis  
A03.9 Shigellosis, unspecified  
A04.0 Enteropathogenic *Escherichia coli* infection  
A04.1 Enterotoxigenic *Escherichia coli* infection  
A04.2 Enteroinvasive *Escherichia coli* infection  
A04.3 Enterohemorrhagic *Escherichia coli* infection  
A04.4 Other intestinal *Escherichia coli* infections  
A04.5 *Campylobacter* enteritis  
A04.6 Enteritis due to *Yersinia enterocolitica*  
A04.7 Enterocolitis due to *Clostridium difficile*  
A04.8 Other specified bacterial intestinal infections  
A04.9 Bacterial intestinal infection, unspecified  
A05.0 Foodborne staphylococcal intoxication  
A05.1 Botulism food poisoning  
A05.2 Foodborne *Clostridium perfringens* [*Clostridium welchii*] intoxication  
A05.3 Foodborne *Vibrio parahaemolyticus* intoxication  
A05.4 Foodborne *Bacillus cereus* intoxication  
A05.8 Other specified bacterial foodborne intoxications  
A05.9 Bacterial foodborne intoxication, unspecified  
A06.0 Acute amebic dysentery  
A06.1 Chronic intestinal amebiasis  
A06.2 Amebic nondysenteric colitis  
A06.3 Amoeboma of intestine  
A06.4 Amebic liver abscess  
A06.9 Amebiasis, unspecified  
A07.0 Balantidiasis  
A07.1 Giardiasis [lambliasis]  
A07.2 Cryptosporidiosis  
A07.3 Isosporiasis  
A07.8 Other specified protozoal intestinal diseases  
A07.9 Protozoal intestinal disease, unspecified  
A08.0 Rotaviral enteritis  
A08.1 Acute gastroenteropathy due to Norwalk agent  
A08.2 Adenoviral enteritis  
A08.3 Other viral enteritis  
A08.4 Viral intestinal infection, unspecified  
A08.5 Other specified intestinal infections  
A09 Infectious gastroenteritis and colitis, unspecified  
A09.0 Other and unspecified gastroenteritis and colitis of infectious origin  
A09.9 Gastroenteritis and colitis of unspecified origin  
A21.3 Gastrointestinal tularemia  
A22.2 Gastrointestinal anthrax  
B37.88 Candidiasis of other sites  
B71.0 Hymenolepiasis

B71.9 Cestode infection, unspecified  
 B76.0 Ancylostomiasis  
 B78.9 Strongyloidiasis, unspecified  
 B81.0 Anisakiasis  
 B96.81 Helicobacter pylori [H. pylori] as the cause of diseases classified to other chapters  
 K52.8 Other specified noninfective gastroenteritis and colitis

A06.5 Amebic lung abscess  
 A15.0 Tuberculosis of lung  
 A15.1 Tuberculosis of lung, confirmed by culture only  
 A15.2 Tuberculosis of lung, confirmed histologically  
 A15.3 Tuberculosis of lung, confirmed by unspecified means  
 A15.4 Tuberculosis of intrathoracic lymph nodes  
 A15.5 Tuberculosis of larynx, trachea and bronchus  
 A15.6 Tuberculosis pleurisy  
 A15.7 Primary respiratory tuberculosis  
 A15.8 Other respiratory tuberculosis  
 A15.9 Respiratory tuberculosis unspecified, confirmed bacteriologically and histologically  
 A16.0 Tuberculosis of lung, bacteriologically and histologically negative  
 A16.1 Tuberculosis of lung, bacteriological and histological examination not done  
 A16.2 Tuberculosis of lung, without mention of bacteriological or histological confirmation  
 A16.3 Tuberculosis of intrathoracic lymph nodes, without mention of bacteriological or histological confirmation  
 A16.4 Tuberculosis of larynx, trachea and bronchus, without mention of bacteriological or histological confirmation  
 A16.5 Tuberculous pleurisy, without mention of bacteriological or histological confirmation  
 A16.7 Primary respiratory tuberculosis, without mention of bacteriological or histological confirmation  
 A16.8 Other respiratory tuberculosis, without mention of bacteriological or histological confirmation  
 A16.9 Respiratory tuberculosis unspecified, without mention of bacteriological or histological confirmation  
 A19.2 Acute miliary tuberculosis, unspecified  
 A19.8 Other miliary tuberculosis  
 A19.9 Miliary tuberculosis, unspecified  
 A20.2 Pneumonic plague  
 A21.2 Pulmonary tularemia  
 A22.1 Pulmonary anthrax  
 A24.0 Glanders  
 A31.0 Pulmonary mycobacterial infection  
 A37.0 Whooping cough due to Bordetella pertussis  
 A37.1 Whooping cough due to Bordetella parapertussis  
 A37.8 Whooping cough due to other Bordetella species  
 A37.9 Whooping cough, unspecified  
 A42.0 Pulmonary actinomycosis  
 A48.1 Legionnaires disease  
 A70 Chlamydia psittaci infections  
 A70 (no description found)  
 B01.2 Varicella pneumonia  
 B05.2 Measles complicated by pneumonia  
 B34.0 Adenovirus infection, unspecified  
 B37.1 Pulmonary candidiasis  
 B38.0 Acute pulmonary coccidioidomycosis  
 B38.1 Chronic pulmonary coccidioidomycosis  
 B38.2 Pulmonary coccidioidomycosis, unspecified  
 B39.0 Acute pulmonary histoplasmosis capsulati  
 B39.1 Chronic pulmonary histoplasmosis capsulati  
 B39.2 Pulmonary histoplasmosis capsulati, unspecified

B39.3 Disseminated histoplasmosis capsulati  
 B39.4 Histoplasmosis capsulati, unspecified  
 B39.5 Histoplasmosis duboisii  
 B39.9 Histoplasmosis, unspecified  
 B40.0 Acute pulmonary blastomycosis  
 B40.1 Chronic pulmonary blastomycosis  
 B40.2 Pulmonary blastomycosis, unspecified  
 B40.3 Cutaneous blastomycosis  
 B40.7 Disseminated blastomycosis  
 B40.8 Other forms of blastomycosis  
 B41.0 Pulmonary paracoccidioidomycosis  
 B42.0 Pulmonary sporotrichosis  
 B44.0 Invasive pulmonary aspergillosis  
 B44.1 Other pulmonary aspergillosis  
 B45.0 Pulmonary cryptococcosis  
 B58.3 Pulmonary toxoplasmosis  
 B59 Pneumocystosis  
 J05.0 Acute obstructive laryngitis [croup]  
 J09 Influenza due to certain identified influenza virus  
 J10.0 Influenza with pneumonia, influenza virus identified  
 J10.1 Influenza due to other influenza virus with respiratory manifestations  
 J11.0 Influenza with pneumonia, virus not identified  
 J11.1 Influenza with other respiratory manifestations, virus not identified  
 J12.0 Adenoviral pneumonia  
 J12.1 Respiratory syncytial virus pneumonia  
 J12.2 Parainfluenza virus pneumonia  
 J12.3 Human metapneumovirus pneumonia  
 J12.8 Other viral pneumonia  
 J12.9 Viral pneumonia, unspecified  
 J13 Pneumonia due to Streptococcus pneumoniae  
 J14 Pneumonia due to Hemophilus influenzae  
 J15.0 Pneumonia due to Klebsiella pneumoniae  
 J15.1 Pneumonia due to Pseudomonas  
 J15.2 Pneumonia due to staphylococcus  
 J15.3 Pneumonia due to streptococcus, group B  
 J15.4 Pneumonia due to other streptococci  
 J15.5 Pneumonia due to Escherichia coli  
 J15.6 Pneumonia due to other aerobic Gram-negative bacteria  
 J15.7 Pneumonia due to Mycoplasma pneumoniae  
 J15.8 Pneumonia due to other specified bacteria  
 J15.9 Unspecified bacterial pneumonia  
 J16.0 Chlamydial pneumonia  
 J16.8 Pneumonia due to other specified infectious organisms  
 J17.0 Pneumonia in bacterial diseases classified elsewhere  
 J17.1 Pneumonia in viral diseases classified elsewhere  
 J17.2 Pneumonia in mycoses  
 J17.3 Pneumonia in parasitic diseases  
 J17.8 Pneumonia in other diseases classified elsewhere  
 J18.0 Bronchopneumonia, unspecified organism  
 J18.1 Lobar pneumonia, unspecified  
 J18.8 Other pneumonia, unspecified organism  
 J18.9 Pneumonia, unspecified  
 J20.0 Acute bronchitis due to Mycoplasma pneumoniae  
 J20.1 Acute bronchitis due to Hemophilus influenzae

J20.2 Acute bronchitis due to streptococcus  
 J20.3 Acute bronchitis due to coxsackievirus  
 J20.4 Acute bronchitis due to parainfluenza virus  
 J20.5 Acute bronchitis due to respiratory syncytial virus  
 J20.6 Acute bronchitis due to rhinovirus  
 J20.7 Acute bronchitis due to echovirus  
 J20.8 Acute bronchitis due to other specified organisms  
 J20.9 Acute bronchitis, unspecified  
 J21.0 Acute bronchiolitis due to respiratory syncytial virus  
 J21.1 Acute bronchiolitis due to human megapneumovirus  
 J21.8 Acute bronchiolitis due to other specified organisms  
 J21.9 Acute bronchiolitis, unspecified  
 J22 Unspecified acute lower respiratory infection  
 J22.0 (no description found)  
 J40 Bronchitis, not specified as acute or chronic  
 J41.0 Simple chronic bronchitis  
 J41.1 Mucopurulent chronic bronchitis  
 J41.8 Mixed simple and mucopurulent chronic bronchitis  
 J42 Unspecified chronic bronchitis  
 J44.0 Chronic obstructive pulmonary disease with acute lower respiratory infection  
 J47 Bronchiectasis  
 J65 Pneumoconiosis associated with tuberculosis  
 J85.0 Gangrene and necrosis of lung  
 J85.1 Abscess of lung with pneumonia  
 J85.2 Abscess of lung without pneumonia  
 J86.0 Pyothorax with fistula  
 J86.9 Pyothorax without fistula  
 P23.0 Congenital pneumonia due to viral agent  
 P23.2 Congenital pneumonia due to staphylococcus  
 P23.3 Congenital pneumonia due to staphylococcus, group B  
 P23.4 Congenital pneumonia due to Escherichia coli  
 P23.5 Congenital pneumonia due to Pseudomonas  
 P23.6 Congenital pneumonia due to other bacterial agents  
 P23.8 Congenital pneumonia due to other organisms  
 P23.9 Congenital pneumonia, unspecified  
  
 A31.1 Cutaneous mycobacterial infection  
 A46 Erysipelas  
 B00.0 Eczema herpeticum  
 B35.0 Tinea barbae and tinea capitis  
 B35.1 Tinea unguium  
 B35.2 Tinea manuum  
 B35.3 Tinea pedis  
 B35.4 Tinea corporis  
 B35.5 Tinea imbricate  
 B35.6 Tinea cruris  
 B35.8 Other dermatophytoses  
 B35.9 Dermatophytosis, unspecified  
 B36.0 Pityriasis versicolour  
 B36.1 Tinea nigra  
 B36.2 White piedra  
 B36.3 Black piedra  
 B36.8 Other specified superficial mycoses  
 B37.2 Candidiasis of skin and nail

B85.0 Pediculosis due to *Pediculus humanus capitis*  
 B85.1 Pediculosis due to *Pediculus humanus corporis*  
 B85.2 Pediculosis, unspecified  
 B85.3 Phthiriasis  
 B85.4 Mixed pediculosis and phthiriasis  
 B86 Scabies  
 B87.9 Myiasis, unspecified  
 B88.0 Other acaridiasis  
 B88.1 Tungiasis [sandflea infestation]  
 B88.2 Other arthropod infestations  
 B88.3 External hirudiniasis  
 B88.8 Other specified infestations  
 B88.9 Infestation, unspecified  
 H60.3 Other infective otitis externa  
 L00 Staphylococcal scalded skin syndrome  
 L01.0 Impetigo [any organism] [any site]  
 L02.0 Cutaneous abscess, furuncle and carbuncle of face  
 L02.1 Cutaneous abscess, furuncle and carbuncle of neck  
 L02.2 Cutaneous abscess, furuncle and carbuncle of trunk  
 L02.3 Cutaneous abscess, furuncle and carbuncle of buttock  
 L02.4 Cutaneous abscess, furuncle and carbuncle of limb  
 L02.8 Cutaneous abscess, furuncle and carbuncle of other sites  
 L02.9 Cutaneous abscess, furuncle and carbuncle, unspecified  
 L03.01 Cellulitis of finger  
 L03.02 Cellulitis of toe  
 L03.10 Cellulitis of upper limb  
 L03.11 Cellulitis of lower limb  
 L03.2 Cellulitis of face  
 L03.3 Cellulitis of trunk  
 L03.8 Cellulitis of other sites  
 L03.9 Cellulitis, unspecified  
 L05.0 Pilonidal cyst with abscess  
 L05.9 Pilonidal cyst without abscess  
 L08.0 Pyoderma  
 L08.1 Erythrasma  
 L08.8 Other specified local infections of skin and subcutaneous tissue  
 L08.9 Local infection of the skin and subcutaneous tissue, unspecified  
 L13.0 Dermatitis herpetiformis  
 L30.3 Infective dermatitis  
 L88 Pyoderma gangrenosum  
 M60.09 Infective myositis, multiple sites  
 M63.0 Myositis in bacterial diseases classified elsewhere  
 M63.1 Myositis in protozoal and parasitic infections classified elsewhere  
 M63.2 Myositis in other infectious diseases classified elsewhere  
 M65.0 Abscess of tendon sheath  
 M65.1 Other infective (teno)synovitis  
 M68.0 Synovitis and tenosynovitis in bacterial diseases classified elsewhere  
 M71.0 Abscess of bursa  
 M71.1 Other infective bursitis  
 O91.00 Infection of nipple associated with childbirth, without mention of attachment difficulty  
 O91.10 Abscess of breast associated with childbirth, without mention of attachment difficulty  
 P39.0 Neonatal infective mastitis  
 P39.4 Neonatal skin infection



A36.0 Pharyngeal diphtheria  
 A36.1 Nasopharyngeal diphtheria  
 A36.2 Laryngeal diphtheria  
 B05.3 Measles complicated by otitis media  
 H65.0 Acute serous otitis media  
 H65.1 Other acute nonsuppurative otitis media  
 H65.2 Chronic serous otitis media  
 H65.3 Chronic mucoid otitis media  
 H65.4 Other chronic nonsuppurative otitis media  
 H65.9 Nonsuppurative otitis media, unspecified  
 H66.0 Acute suppurative otitis media  
 H66.1 Chronic tubotympanic suppurative otitis media  
 H66.2 Chronic atticofacial suppurative otitis media  
 H66.3 Other chronic suppurative otitis media  
 H66.4 Suppurative otitis media, unspecified  
 H66.9 Otitis media, unspecified  
 H67.0 Otitis media in bacterial diseases classified elsewhere  
 H67.8 Otitis media in other diseases classified elsewhere  
 H68.0 Eustachian salpingitis  
 H70.0 Acute mastoiditis  
 H70.1 Chronic mastoiditis  
 H70.2 Petrositis  
 H70.8 Other mastoiditis and related conditions  
 H70.9 Mastoiditis, unspecified  
 H72.0 Central perforation of tympanic membrane  
 H72.1 Attic perforation of tympanic membrane  
 H72.2 Other marginal perforations of tympanic membrane  
 H72.8 Other perforations of tympanic membrane  
 H72.9 Perforation of tympanic membrane, unspecified  
 H73.0 Acute myringitis  
 H75.0 Mastoiditis in infectious and parasitic diseases classified elsewhere  
 H83.0 Labyrinthitis  
 H92.1 Otorrhoea  
 J00 Acute nasopharyngitis [common cold]  
 J01.0 Acute maxillary sinusitis  
 J01.1 Acute frontal sinusitis  
 J01.2 Acute ethmoidal sinusitis  
 J01.3 Acute sphenoidal sinusitis  
 J01.4 Acute pansinusitis  
 J01.8 Other acute sinusitis  
 J01.9 Acute sinusitis, unspecified  
 J02.0 Streptococcal pharyngitis  
 J02.8 Acute pharyngitis due to other specified organisms  
 J02.9 Acute pharyngitis, unspecified  
 J03.0 Streptococcal tonsillitis  
 J03.8 Acute tonsillitis due to other specified organisms  
 J03.9 Acute tonsillitis, unspecified  
 J04.0 Acute laryngitis  
 J04.1 Acute tracheitis  
 J04.2 Acute laryngotracheitis  
 J05.1 Acute epiglottitis  
 J06.0 Acute laryngopharyngitis  
 J06.8 Other acute upper respiratory infections of multiple sites  
 J06.9 Acute upper respiratory infection, unspecified

J32.0 Chronic maxillary sinusitis  
 J32.1 Chronic frontal sinusitis  
 J32.2 Chronic ethmoidal sinusitis  
 J32.3 Chronic sphenoidal sinusitis  
 J32.4 Chronic pansinusitis  
 J32.8 Other chronic sinusitis  
 J32.9 Chronic sinusitis, unspecified  
 J34.0 Abscess, furuncle and carbuncle of nose  
 J35.0 Chronic tonsillitis  
 J36 Peritonsillar abscess

A51.0 Primary genital syphilis  
 A51.1 Primary anal syphilis  
 A51.2 Primary syphilis of other sites  
 A51.3 Secondary syphilis of skin and mucous membranes  
 A51.4 Other secondary syphilis  
 A51.5 Early syphilis, latent  
 A51.9 Early syphilis, unspecified  
 A52.9 Late syphilis, unspecified  
 A53.0 Latent syphilis, unspecified as early or late  
 A53.9 Syphilis, unspecified  
 A54.0 Gonococcal infection of lower genitourinary tract without periurethral or accessory gland abscess  
 A54.1 Gonococcal infection of lower genitourinary tract with periurethral and accessory gland abscess  
 A54.2 Gonococcal pelviperitonitis and other gonococcal genitourinary infections  
 A54.3 Gonococcal infection of eye  
 A54.3 (no description found)  
 A54.4 Gonococcal infection of musculoskeletal system  
 A54.5 Gonococcal pharyngitis  
 A54.6 Gonococcal infection of anus and rectum  
 A54.8 Other gonococcal infections  
 A54.8 (no description found)  
 A54.9 Gonococcal infection, unspecified  
 A55 Chlamydial lymphogranuloma (venereum)  
 A56.0 Chlamydial infection of lower genitourinary tract  
 A56.1 Chlamydial infection of pelviperitoneum and other genitourinary organs  
 A56.2 Chlamydial infection of genitourinary tract, unspecified  
 A56.3 Chlamydial infection of anus and rectum  
 A56.4 Chlamydial infection of pharynx  
 A56.8 Sexually transmitted chlamydial infection of other sites  
 A57 Chancroid  
 A58 Granuloma inguinale  
 A59.0 Urogenital trichomoniasis  
 A59.0 (no description found)  
 A60.0 Herpesviral infection of genitalia and urogenital tract  
 A60.1 Herpesviral infection of perianal skin and rectum  
 A60.9 Anogenital herpesviral infection, unspecified  
 A63.0 Anogenital (venereal) warts  
 A63.8 Other specified predominantly sexually transmitted diseases  
 A64 Unspecified sexually transmitted disease  
 B37.3 Candidiasis of vulva and vagina  
 B37.4 Candidiasis of other urogenital sites  
 N13.6 Pyonephrosis  
 N15.1 Renal and perinephric abscess  
 N30.0 Acute cystitis

N30.8 Other cystitis, abscess of bladder  
 N34.0 Urethral abscess  
 N35.1 Postinfective urethral stricture, not elsewhere classified  
 N39.0 Urinary tract infection, site not specified  
 N41.0 Acute prostatitis  
 N41.2 Abscess of prostate  
 N43.1 Infected hydrocele  
 N45.0 Orchitis, epididymitis and epididymo-orchitis with abscess  
 N45.9 Orchitis, epididymitis and epididymo-orchitis without abscess  
 N51.2 Balanitis in diseases classified elsewhere  
 N70.0 Acute salpingitis and oophoritis  
 N73.0 Acute parametritis and pelvic cellulitis  
 N73.1 Chronic parametritis and pelvic cellulitis  
 N73.2 Unspecified parametritis and pelvic cellulitis  
 N73.3 Female acute pelvic peritonitis  
 N73.4 Female chronic pelvic peritonitis  
 N73.9 Female pelvic inflammatory disease, unspecified  
 N74.2 Female syphilitic pelvic inflammatory disease  
 N74.3 Female gonococcal pelvic inflammatory disease  
 N74.4 Female chlamydial pelvic inflammatory disease  
 N75.0 Cyst of Bartholins gland  
 N75.1 Abscess of Bartholins gland  
 N76.0 Acute vaginitis  
 N76.4 Abscess of vulva  
 O03.0 Spontaneous abortion, incomplete, complicated by genital tract and pelvic infection  
 O03.5 Spontaneous abortion, complete or unspecified, complicated by genital tract and pelvic infection  
 O08.0 Genital tract and pelvic infection following ectopic and molar pregnancy  
 O26.4 Herpes gestationis  
 O86.2 Urinary tract infection following delivery  
 O98.1 Syphilis complicating pregnancy, childbirth and the puerperium  
 O98.2 Gonorrhoea complicating pregnancy, childbirth and the puerperium  
 P39.3 Neonatal urinary tract infection

A80.1 Acute paralytic poliomyelitis, wild virus, imported  
 A80.2 Acute paralytic poliomyelitis, wild virus, indigenous  
 A80.3 Acute paralytic poliomyelitis, other and unspecified  
 A80.4 Acute nonparalytic poliomyelitis  
 A80.9 Acute poliomyelitis, unspecified  
 A81.8 Other atypical virus infections of central nervous system  
 A81.9 Atypical virus infection of central nervous system, unspecified  
 A82.0 Sylvatic rabies  
 A82.1 Urban rabies  
 A82.9 Rabies, unspecified  
 A83.0 Japanese encephalitis  
 A83.1 Western equine encephalitis  
 A83.2 Eastern equine encephalitis  
 A83.3 St Louis encephalitis  
 A83.4 Australian encephalitis  
 A83.5 California encephalitis  
 A83.6 Rocio virus disease  
 A83.8 Other mosquito-borne viral encephalitis  
 A83.9 Mosquito-borne viral encephalitis, unspecified  
 A84.0 Far Eastern tick-borne encephalitis [Russian spring-summer encephalitis]  
 A84.1 Central European tick-borne encephalitis

A84.8 Other tick-borne viral encephalitis  
A84.9 Tick-borne viral encephalitis, unspecified  
A85.0 Enteroviral encephalitis  
A85.1 Adenoviral encephalitis  
A85.2 Arthropod-borne viral encephalitis, unspecified  
A85.8 Other specified viral encephalitis  
A86 Unspecified viral encephalitis  
A87.0 Enteroviral meningitis  
A87.1 Adenoviral meningitis  
A87.2 Lymphocytic choriomeningitis  
A87.8 Other viral meningitis  
A87.9 Viral meningitis, unspecified  
A88.0 Enteroviral exanthematous fever  
A88.8 Other specified viral infections of central nervous system  
A89 Unspecified viral infection of central nervous system  
A90 Dengue fever [classical dengue]  
A91 Dengue haemorrhagic fever  
A92.0 Chikungunya virus disease  
A92.1 O'nyong-nyong fever  
A92.2 Venezuelan equine fever  
A92.3 West Nile virus infection  
A92.4 Rift Valley fever  
A92.8 Other specified mosquito-borne viral fevers  
A92.9 Mosquito-borne viral fever, unspecified  
A93.0 Oropouche virus disease  
A93.2 Colorado tick fever  
A93.8 Other specified arthropod-borne viral fevers  
A94 Unspecified arthropod-borne viral fever  
A95.0 Sylvatic yellow fever  
A95.1 Urban yellow fever  
A95.9 Yellow fever, unspecified  
A96.0 Junin haemorrhagic fever  
A96.1 Machupo haemorrhagic fever  
A96.2 Lassa fever  
A96.8 Other arenaviral hemorrhagic fevers  
A96.9 Arenaviral haemorrhagic fever, unspecified  
A98.0 Crimean-Congo hemorrhagic fever  
A98.1 Omsk hemorrhagic fever  
A98.2 Kyasanur Forest disease  
A98.3 Marburg virus disease  
A98.4 Ebola virus disease  
A98.5 Hemorrhagic fever with renal syndrome  
A98.8 Other specified viral haemorrhagic fevers  
A99 Unspecified viral haemorrhagic fever  
B00.1 Herpesviral vesicular dermatitis  
B00.2 Herpesviral gingivostomatitis and pharyngotonsillitis  
B00.3 Herpesviral meningitis  
B00.4 Herpesviral encephalitis  
B00.5 Herpesviral ocular disease  
B00.7 Disseminated herpesviral disease  
B00.8 Other forms of herpesviral infection  
B00.9 Herpesviral infection, unspecified  
B01.0 Varicella meningitis  
B01.1 Varicella encephalitis

B01.8 Varicella with other complications  
B01.9 Varicella without complication  
B02.0 Zoster encephalitis  
B02.1 Zoster meningitis  
B02.2 Zoster with other nervous system involvement  
B02.3 Zoster ocular disease  
B02.7 Disseminated zoster  
B02.8 Zoster with other complications  
B02.9 Zoster without complications  
B03 Smallpox  
B04 Monkeypox  
B05.0 Measles complicated by encephalitis  
B05.1 Measles complicated by meningitis  
B05.4 Measles with intestinal complications  
B05.8 Measles with other complications  
B05.9 Measles without complication  
B06.0 Rubella with neurological complications  
B06.8 Rubella with other complications  
B06.9 Rubella without complication  
B07 Viral warts  
B08.0 Other orthopoxvirus infections  
B08.1 Molluscum contagiosum  
B08.2 Exanthema subitum [sixth disease]  
B08.3 Erythema infectiosum [fifth disease]  
B08.4 Enteroviral vesicular stomatitis with exanthem  
B08.5 Enteroviral vesicular pharyngitis  
B08.8 Other specified viral infections characterized by skin and mucous membrane lesions  
B09 Unspecified viral infection characterized by skin and mucous membrane lesions  
B15.0 Hepatitis A with hepatic coma  
B15.9 Hepatitis A without hepatic coma  
B16.0 Acute hepatitis B with delta-agent with hepatic coma  
B16.1 Acute hepatitis B with delta-agent without hepatic coma  
B16.2 Acute hepatitis B without delta-agent with hepatic coma  
B16.9 Acute hepatitis B without delta-agent and without hepatic coma  
B17.0 Acute delta-(super) infection of hepatitis B carrier  
B17.1 Acute hepatitis C  
B17.2 Acute hepatitis E  
B17.8 Other specified acute viral hepatitis  
B17.9 Acute viral hepatitis, unspecified  
B18.0 Chronic viral hepatitis B with delta-agent  
B18.1 Chronic viral hepatitis B without delta-agent  
B18.2 Chronic viral hepatitis C  
B18.8 Other chronic viral hepatitis  
B18.9 Chronic viral hepatitis, unspecified  
B19.0 Unspecified viral hepatitis with hepatic coma  
B19.9 Unspecified viral hepatitis without hepatic coma  
B20.0 HIV disease resulting in mycobacterial infection  
B20.1 HIV disease resulting in other bacterial infections  
B20.2 HIV disease resulting in cytomegaloviral disease  
B20.3 HIV disease resulting in other viral infections  
B20.4 HIV disease resulting in candidiasis  
B20.5 HIV disease resulting in other mycoses  
B20.6 HIV disease resulting in Pneumocystis jirovecii pneumonia  
B20.7 HIV disease resulting in multiple infections

B20.8 HIV disease resulting in other infectious and parasitic diseases  
 B20.9 HIV disease resulting in unspecified infectious or parasitic  
 B21.0 HIV disease resulting in Kaposi sarcoma  
 B21.1 HIV disease resulting in Burkitt lymphoma  
 B21.2 HIV disease resulting in other types of non-Hodgkin lymphoma  
 B21.3 HIV disease resulting in other malignant neoplasms of lymphoid, haematopoietic and related tissue  
 B21.7 HIV disease resulting in multiple malignant neoplasms  
 B21.8 HIV disease resulting in other malignant neoplasms  
 B21.9 HIV disease resulting in unspecified malignant neoplasm  
 B22.0 HIV disease resulting in encephalopathy  
 B22.1 HIV disease resulting in lymphoid interstitial pneumonitis  
 B22.2 HIV disease resulting in wasting syndrome  
 B22.7 HIV disease resulting in multiple diseases classified elsewhere  
 B23.0 Acute HIV infection syndrome  
 B23.1 HIV disease resulting in (persistent) generalized lymphadenopathy  
 B23.2 HIV disease resulting in haematological and immunological abnormalities, not elsewhere classified  
 B23.8 HIV disease resulting in other specified conditions  
 B24 Unspecified human immunodeficiency virus [HIV] disease  
 B25.0 Cytomegaloviral pneumonitis  
 B25.1 Cytomegaloviral hepatitis  
 B25.2 Cytomegaloviral pancreatitis  
 B25.8 Other cytomegaloviral diseases  
 B25.9 Cytomegaloviral disease, unspecified  
 B26.0 Mumps orchitis  
 B26.1 Mumps meningitis  
 B26.2 Mumps encephalitis  
 B26.3 Mumps pancreatitis  
 B26.8 Mumps with other complications  
 B26.8 (no description found)  
 B26.9 Mumps without complication  
 B27.0 Gammaherpesviral mononucleosis  
 B27.1 Cytomegaloviral mononucleosis  
 B27.8 Other infectious mononucleosis  
 B27.9 Infectious mononucleosis, unspecified  
 B30.0 Keratoconjunctivitis due to adenovirus  
 B30.1 Conjunctivitis due to adenovirus  
 B30.2 (no description found)  
 B30.3 Acute epidemic hemorrhagic conjunctivitis (enteroviral)  
 B30.8 Other viral conjunctivitis  
 B30.9 Viral conjunctivitis, unspecified  
 B33.0 Epidemic myalgia  
 B33.1 Ross River disease  
 B33.2 Viral carditis  
 B33.3 Retrovirus infections, not elsewhere classified  
 B33.4 Hantavirus (cardio-) pulmonary syndrome  
 B33.8 Other specified viral diseases  
 B34.1 Enterovirus infection, unspecified  
 B34.2 Coronavirus infection, unspecified site  
 B34.3 Parvovirus infection, unspecified site  
 B34.4 Papovavirus infection, unspecified  
 B34.8 Other viral infections of unspecified site  
 B34.9 Viral infection, unspecified  
 B97.0 Adenovirus as the cause of diseases classified to other chapters  
 B97.1 Enterovirus as the cause of diseases classified to other chapters

B97.2 Coronavirus as the cause of diseases classified to other chapters  
B97.3 Retrovirus as the cause of diseases classified to other chapters  
B97.4 Respiratory syncytial virus as the cause of diseases classified to other chapters  
B97.5 Reovirus as the cause of diseases classified to other chapters  
B97.6 Parvovirus as the cause of diseases classified to other chapters  
B97.7 Papillomavirus as the cause of diseases classified to other chapters  
B97.8 Other viral agents as the cause of diseases classified to other chapters  
G02.0 Meningitis in viral diseases classified elsewhere  
G05.1 Encephalitis, myelitis and encephalomyelitis in viral diseases classified elsewhere  
H19.1 Herpesviral keratitis and keratoconjunctivitis  
I41.1 Myocarditis in viral diseases classified elsewhere  
J10.8 Influenza with other manifestations, influenza virus identified  
J11 Influenza, virus not identified  
J11.8 Influenza with other manifestations, virus not identified  
M01.4 Rubella arthritis  
M01.50 Arthritis in other viral diseases classified elsewhere, multiple sites  
M01.51 Arthritis in other viral diseases classified elsewhere, shoulder region  
M01.52 Arthritis in other viral diseases classified elsewhere, upper arm  
M01.53 Arthritis in other viral diseases classified elsewhere, forearm  
M01.54 Arthritis in other viral diseases classified elsewhere, hand  
M01.55 Arthritis in other viral diseases classified elsewhere, pelvic region and thigh  
M01.56 Arthritis in other viral diseases classified elsewhere, lower leg  
M01.57 Arthritis in other viral diseases classified elsewhere, ankle and foot  
M01.58 Arthritis in other viral diseases classified elsewhere, other site  
M01.59 Arthritis in other viral diseases classified elsewhere, site unspecified  
O98.4 Viral hepatitis complicating pregnancy, childbirth and the puerperium  
O98.5 Other viral diseases complicating pregnancy, childbirth and the puerperium  
P35.0 Congenital rubella syndrome  
P35.1 Congenital cytomegalovirus infection  
P35.2 Congenital herpesviral [herpes simplex] infection  
P35.3 Congenital viral hepatitis  
P35.8 Other congenital viral diseases  
P35.9 Congenital viral disease, unspecified  
Z21 Asymptomatic human immunodeficiency virus [HIV] infection status

## **Respiratory non-infection**

|            |                                                                                                               |
|------------|---------------------------------------------------------------------------------------------------------------|
| J30-J309   | Vasomotor and allergic rhinitis                                                                               |
| J31-J312   | Chronic rhinitis, nasopharyngitis and pharyngitis                                                             |
| J32-J329   | Chronic sinusitis                                                                                             |
| J33-J339   | Nasal polyp                                                                                                   |
| J34-J349   | Other and unsepcified disorders of nose and nasal sinuses                                                     |
| J3501-J359 | Chronic diseases of tonsils and adenoids                                                                      |
| J36        | Peritonsillar abscess                                                                                         |
| J37-J371   | Chronic laryngitis and laryngotracheitis                                                                      |
| J38-J387   | Diseases of vocal cords and larynx, not elsewhere classified                                                  |
| J39-J399   | Other diseases of upper respiratory tract                                                                     |
| J40        | Bronchitis, not specified as acute or chronic                                                                 |
| J41        | Simple and mucopurulent chronic bronchitis                                                                    |
| J42        | Unspecified chronic bronchitis                                                                                |
| J43        | Emphysema                                                                                                     |
| J44        | Other chronic obstructive pulmonary disease                                                                   |
| J45        | Asthma                                                                                                        |
| J47        | Bronchiectasis                                                                                                |
| J80        | Acute respiratory distress syndrome                                                                           |
| J81        | Pulmonary edema                                                                                               |
| J82        | Pulmonary eosinophilia, not elsewhere classified                                                              |
| J84        | Other interstitial pulmonary diseases                                                                         |
| J85        | Abscess of lung and mediastinum                                                                               |
| J86        | Pyothorax                                                                                                     |
| J90        | Pleural effusion, not elsewhere classified                                                                    |
| J91        | Pleural effusion in conditions classified elsewhere                                                           |
| J92        | Pleural plaque                                                                                                |
| J93        | Pneumothorax and air leak                                                                                     |
| J94        | Other pleural conditions                                                                                      |
| J95        | Intraoperative and postprocedural complications and disorders of respiratory system, not elsewhere classified |
| J96        | Respiratory failure, not elsewhere classified                                                                 |
| J98        | Other respiratory disorders                                                                                   |
| J99        | Respiratory disorders in diseases classified elsewhere                                                        |

### **Exclude:**

|      |                                             |
|------|---------------------------------------------|
| J849 | Interstitial pulmonary disease, unspecified |
|------|---------------------------------------------|



## **Gastrointestinal non-infection**

|     |                                                                                                             |
|-----|-------------------------------------------------------------------------------------------------------------|
| K20 | Esophagitis                                                                                                 |
| K21 | Gastro-esophageal reflux disease                                                                            |
| K22 | Other diseases of esophagus                                                                                 |
| K23 | Disorders of esophagus in diseases classified elsewhere                                                     |
| K25 | Gastric ulcer                                                                                               |
| K26 | Duodenal ulcer                                                                                              |
| K27 | Peptic ulcer, site unspecified                                                                              |
| K28 | Gastrojejunal ulcer                                                                                         |
| K29 | Gastritis and duodenitis                                                                                    |
| K30 | Functional dyspepsia                                                                                        |
| K31 | Other diseases of stomach and duodenum                                                                      |
| K90 | Intestinal malabsorption                                                                                    |
| K91 | Intraoperative and postprocedural complications and disorders of digestive system, not elsewhere classified |
| K92 | Other diseases of digestive system                                                                          |
| K40 | Inguinal hernia                                                                                             |
| K41 | Femoral hernia                                                                                              |
| K42 | Umbilical hernia                                                                                            |
| K43 | Ventral hernia                                                                                              |
| K44 | Diaphragmatic hernia                                                                                        |
| K45 | Other abdominal hernia                                                                                      |
| K46 | Unspecified abdominal hernia                                                                                |
| K50 | Crohn's disease                                                                                             |
| K51 | Ulcerative colitis                                                                                          |
| K52 | Other and unspecified noninfective gastroenteritis and colitis                                              |
| K55 | Vascular disorders of intestine                                                                             |
| K56 | Paralytic ileus and intestinal obstruction without hernia                                                   |
| K57 | Diverticular disease of intestine                                                                           |
| K58 | Irritable bowel syndrome                                                                                    |
| K59 | Other functional intestinal disorders                                                                       |
| K60 | Fissure and fistula of anal and rectal regions                                                              |
| K61 | Abcess of anal and rectal regions                                                                           |
| K62 | Other diseases of anus and rectum                                                                           |
| K63 | Other diseases of intestine                                                                                 |
| K65 | Peritonitis                                                                                                 |
| K66 | Other disorders of peritoneum                                                                               |

### **Exclude:**

|      |                                   |
|------|-----------------------------------|
| K650 | Generalized (acute) peritonitis   |
| K651 | Peritoneal abscess                |
| K652 | Spontaneous bacterial peritonitis |

## **Oral cavity**

|           |                                                                  |
|-----------|------------------------------------------------------------------|
| K00-K09   | Diseases of oral cavity and salivary glands                      |
| K01       | Dysphagia                                                        |
| K02-K029  | Dental caries                                                    |
| K03-K039  | Other diseases of hard tissues of teeth                          |
| K04-K0499 | Diseases of pulp and periapical tissues                          |
| K05-K056  | Gingivitis and periodontal diseases                              |
| K06-K069  | Other disorders of gingiva and eentulous alveolar ridge          |
| K08-K089  | Other disorders of teeth and supporting structures               |
| K09-K099  | Cysts of oral region, not elsewhere classified                   |
| K11-K119  | Diseases of salivary glands                                      |
| K12-K1239 | Stomatitis and related lesions                                   |
| K13-K1379 | Other diseases of lip and oral mucosa                            |
| K14-K149  | Diseases of tongue                                               |
| R1310     | Dysphagia                                                        |
| Z012      | Encounter for dental examination and cleaning                    |
| Z463      | Encounter for fitting and adjustment of dental prosthetic device |
| Z464      | Encounter for fitting and adjustment of orthodontic device       |

### **Exclude:**

|       |                                       |
|-------|---------------------------------------|
| K0520 | Aggressive periodontitis              |
| K0521 | Aggressive periodontitis, localized   |
| K0522 | Aggressive periodontitis, generalized |

## **Congenital anomalies**

|         |                                                                         |
|---------|-------------------------------------------------------------------------|
| Q00-Q07 | Congenital malformations of the nervous system                          |
| Q10-Q18 | Congenital malformations of eye, ear, face and neck                     |
| Q20-Q28 | Congenital malformations of the circulatory system                      |
| Q30-Q34 | Congenital malformations of the respiratory system                      |
| Q35-Q37 | Cleft lip and cleft palate                                              |
| Q38-Q45 | Other congenital malformations of the digestive system                  |
| Q50-Q56 | Congenital malformations of genital organs                              |
| Q60-Q64 | Congenital malformations of the urinary system                          |
| Q65-Q79 | Congenital malformations and deformations of the musculoskeletal system |
| Q80-Q89 | Other congenital malformations                                          |
| Q90-Q99 | Chromosomal abnormalities, not elsewhere classified                     |

## **Social**

|             |                                                                                                |
|-------------|------------------------------------------------------------------------------------------------|
| Z55-Z65     | Person with potential health hazards related to socio-economic and psychological circumstances |
| Z742-Z749   | Care provider dependency                                                                       |
| Z761        | Supervision and care of foundling                                                              |
| Z762        | Supervision and care of health infant/child                                                    |
| Z0441-Z0442 | Examination following suspected rape                                                           |
| Z0471-Z0472 | Examination following suspected physical abuse                                                 |

### **Exclude:**

|          |                                                                  |
|----------|------------------------------------------------------------------|
| Z57-Z579 | Health issues due to occupational exposures                      |
| Z64      | Psychological problems related to unwanted pregnancy/multiparity |
| Z56-Z569 | Health issues due to unemployment                                |

## **Mental health**

|           |                                                                                                    |
|-----------|----------------------------------------------------------------------------------------------------|
| F90-F909  | Attention-deficit hyperactivity disorders                                                          |
| F91-F919  | Conduct disorders                                                                                  |
| F93-F939  | Emotional disorders with onset specific to childhood                                               |
| F94-F949  | Disorders of social functioning with onset specific to childhood and adolescence                   |
| F95-F959  | Tic disorder                                                                                       |
| F98-F989  | Other behavioral and emotional disorders with onset usually occurring in childhood and adolescence |
| F99       | Mental disorder, not otherwise specified                                                           |
| F40-F409  | Phobic anxiety disorders                                                                           |
| F41-F419  | Other anxiety disorders                                                                            |
| F422-F429 | Obsessive-compulsive disorder                                                                      |
| F43-F439  | Reaction to severe stress, and adjustment disorders                                                |
| F481-F489 | Other nonpsychotic mental disorders                                                                |

## Injury/external

|         |                                                                                 |
|---------|---------------------------------------------------------------------------------|
| J60     | Coalworker's pneumoconiosis                                                     |
| J61     | Pneumoconiosis due to asbestos and other mineral fibres                         |
| J62     | Pneumoconiosis due to dust containing silica                                    |
| J63     | Pneumoconiosis due to other inorganic dusts                                     |
| J64     | Unspecified pneumoconiosis                                                      |
| J65     | Pneumoconiosis associated with tuberculosis                                     |
| J66     | Airway disease due to specific organic dust                                     |
| J67     | Hypersensitivity pneumonitis due to organic dust                                |
| J68     | Respiratory conditions due to inhalation of chemicals, gases, fumes and vapours |
| J69     | Pneumonitis due to solids and liquids                                           |
| J70     | Respiratory conditions due to other external agents                             |
| S00-S09 | Injuries to the head                                                            |
| S10-S19 | Injuries to the neck                                                            |
| S20-S29 | Injuries to the thorax                                                          |
| S30-S39 | Injuries to the abdomen, lower back, lumbar spine and pelvis                    |
| S40-S49 | Injuries to the shoulder and upper arm                                          |
| S50-S59 | Injuries to the elbow and forearm                                               |
| S60-S69 | Injuries to the wrist and hand                                                  |
| S70-S79 | Injuries to the hip and thigh                                                   |
| S80-S89 | Injuries to the knee and lower leg                                              |
| S90-S99 | Injuries to the ankle and foot                                                  |
| T00-T07 | Injuries involving multiple body regions                                        |
| T08-T14 | Injuries to unspecified parts of trunk, limb or body region                     |
| T15-T19 | Effects of foreign body entering through natural orifice                        |
| T20-T32 | Burns and corrosions                                                            |
| T33-T35 | Frostbite                                                                       |
| T36-T50 | Poisoning by drugs, medicaments and biological substances                       |
| T51-T65 | Toxic effects of substances chiefly nonmedicinal as to source                   |
| T66-T78 | Other and unspecified effects of external causes                                |
| T79     | Certain early complications of trauma                                           |
| T80-T88 | Complications of surgical and medical care, not elsewhere classified            |
| T90-T98 | Sequelae of injuries, of poisoning and of other consequences of external causes |
| P10-P15 | Birth trauma                                                                    |
| V01-V99 | Transport accidents                                                             |
| W00-X59 | Other external causes of accidental injury                                      |
| Y85-Y89 | Sequelae of external causes of morbidity and mortality                          |

## **Renal/genitourinary**

- N00 Acute nephritic syndrome
- N01 Rapidly progressive nephritic syndrome
- N02 Recurrent and persistent haematuria
- N03 Chronic nephritic syndrome
- N04 Nephrotic syndrome
- N05 Unspecified nephritic syndrome
- N06 Isolated proteinuria with specified morphological lesion
- N07 Hereditary nephropathy, not elsewhere classified
- N08 Glomerular disorders in diseases classified elsewhere
- N10 Acute tubulo-interstitial nephritis
- N11 Chronic tubulo-interstitial nephritis
- N12 Tubulo-interstitial nephritis, not specified as acute or chronic
- N13 Obstructive and reflux uropathy
- N14 Drug- and heavy-metal-induced tubulo-interstitial and tubular conditions
- N15 Other renal tubulo-interstitial diseases
- N16 Renal tubulo-interstitial disorders in diseases classified elsewhere
- N17 Acute renal failure
- N18 Chronic renal failure
- N19 Unspecified renal failure
- N20 Calculus of kidney and ureter
- N21 Calculus of lower urinary tract
- N22 Calculus of urinary tract in diseases classified elsewhere
- N23 Unspecified renal colic
- N25 Disorders resulting from impaired renal tubular function
- N26 Unspecified contracted kidney
- N27 Small kidney of unknown cause
- N28 Other disorders of kidney and ureter, not elsewhere classified
- N29 Other disorders of kidney and ureter in diseases classified elsewhere
- N30 Cystitis
- N31 Neuromuscular dysfunction of bladder, not elsewhere classified
- N32 Other disorders of bladder
- N33 Bladder disorders in diseases classified elsewhere
- N34 Urethritis and urethral syndrome
- N35 Urethral stricture
- N36 Other disorders of urethra
- N37 Urethral disorders in diseases classified elsewhere
- N39 Other disorders of urinary system
- N40 Hyperplasia of prostate
- N41 Inflammatory diseases of prostate
- N42 Other disorders of prostate
- N43 Hydrocele and spermatocele
- N44 Torsion of testis
- N45 Orchitis and epididymitis
- N46 Male infertility
- N47 Redundant prepuce, phimosis and paraphimosis
- N48 Other disorders of penis
- N49 Inflammatory disorders of male genital organs, not elsewhere classified
- N50 Other disorders of male genital organs
- N51 Disorders of male genital organs in diseases classified elsewhere
- N60 Benign mammary dysplasia
- N61 Inflammatory disorders of breast
- N62 Hypertrophy of breast

- N63 Unspecified lump in breast
- N64 Other disorders of breast
- N70 Salpingitis and oophoritis
- N71 Inflammatory disease of uterus, except cervix
- N72 Inflammatory disease of cervix uteri
- N73 Other female pelvic inflammatory diseases
- N74 Female pelvic inflammatory disorders in diseases classified elsewhere
- N75 Diseases of Bartholin's gland
- N76 Other inflammation of vagina and vulva
- N77 Vulvovaginal ulceration and inflammation in diseases classified elsewhere
- N80 Endometriosis
- N81 Female genital prolapse
- N82 Fistulae involving female genital tract
- N83 Noninflammatory disorders of ovary, fallopian tube and broad ligament
- N84 Polyp of female genital tract
- N85 Other noninflammatory disorders of uterus, except cervix
- N86 Erosion and ectropion of cervix uteri
- N87 Dysplasia of cervix uteri
- N88 Other noninflammatory disorders of cervix uteri
- N89 Other noninflammatory disorders of vagina
- N90 Other noninflammatory disorders of vulva and perineum
- N91 Absent, scanty and rare menstruation
- N92 Excessive, frequent and irregular menstruation
- N93 Other abnormal uterine and vaginal bleeding
- N94 Pain and other conditions associated with female genital organs and menstrual cycle

**Exclude:**

- N2883 Nephroptosis
- N1370 Vesicoureteral-reflux
- N1372 Vesicoureteral-reflux with reflux nephropathy without hydroureter



**Neoplasms**

|            |                                             |
|------------|---------------------------------------------|
| C00-C96Z   | Malignant neoplasm                          |
| D00-D099   | In situ neoplasm                            |
| D10-D369   | Benign neoplasm                             |
| D3701-D489 | Neoplasm of uncertain behaviour             |
| D3A00-D3A8 | Benign tumours                              |
| D49-D499   | Neoplasms of uncertain or unknown behaviour |

**Exclude:**

|     |                                       |
|-----|---------------------------------------|
| D18 | Hemangioma and lymphangioma, any site |
|-----|---------------------------------------|

## **Central nervous system**

- G03 Meningitis due to other and unspecified causes
- G04 Encephalitis, myelitis and encephalomyelitis
- G08 Intracranial and intraspinal phlebitis and thrombophlebitis
- G09 Sequelae of inflammatory diseases of central nervous system
- G10 Huntington's disease
- G11 Hereditary ataxia
- G12 Spinal muscular atrophy and related syndromes
- G13 Systemic atrophies primarily affecting central nervous system in diseases classified elsewhere
- G20 Parkinson's disease
- G21 Secondary parkinsonism
- G22 Parkinsonism in diseases classified elsewhere
- G23 Other degenerative diseases of basal ganglia
- G24 Dystonia
- G25 Other extrapyramidal and movement disorders
- G26 Extrapyramidal and movement disorders in diseases classified elsewhere
- G30 Alzheimer's disease
- G31 Other degenerative diseases of nervous system, not elsewhere classified
- G32 Other degenerative disorders of nervous system in diseases classified elsewhere
- G35 Multiple sclerosis
- G36 Other acute disseminated demyelination
- G37 Other demyelinating diseases of central nervous system
- G40 Epilepsy
- G41 Status epilepticus
- G42 Migraine
- G43 Other headache syndromes
- G44 Transient cerebral ischaemic attacks and related syndromes
- G45 Vascular syndromes of brain in cerebrovascular diseases
- G46 Sleep disorders
- G50 Disorders of trigeminal nerve
- G51 Facial nerve disorders
- G52 Disorders of other cranial nerves
- G53 Cranial nerve disorders in diseases classified elsewhere
- G54 Nerve root and plexus disorders
- G55 Nerve root and plexus compressions in diseases classified elsewhere
- G56 Mononeuropathies of upper limb
- G57 Mononeuropathies of lower limb
- G58 Other mononeuropathies
- G59 Mononeuropathy in diseases classified elsewhere
- G60 Hereditary and idiopathic neuropathy
- G61 Inflammatory polyneuropathy
- G62 Other polyneuropathies
- G63 Polyneuropathy in diseases classified elsewhere
- G64 Other disorders of peripheral nervous system
- G70 Myasthenia gravis and other myoneural disorders
- G71 Primary disorders of muscles
- G72 Other myopathies
- G73 Disorders of myoneural junction and muscle in diseases classified elsewhere
- G80 Cerebral palsy
- G81 Hemiplegia
- G82 Paraplegia and tetraplegia
- G83 Other paralytic syndromes
- G90 Disorders of autonomic nervous system

- G91 Hydrocephalus
- G92 Toxic encephalopathy
- G93 Other disorders of brain
- G94 Other disorders of brain in diseases classified elsewhere
- G95 Other diseases of spinal cord
- G96 Other disorders of central nervous system
- G97 Postprocedural disorders of nervous system, not elsewhere classified
- G98 Other disorders of nervous system, not elsewhere classified
- G99 Other disorders of nervous system in diseases classified elsewhere

**Exclude:**

- G120 Infantile spinal muscular atrophy, type I, Werdnig-Hoffman
- G610 Guillain-Barre syndrome
- G712 Congenital myopathies
- G710 Muscular dystrophy
- G7111 Myotonic muscular dystrophy
- G7112 Myotonia congenita
- G7113 Myotonic chondrodystrophy
- G7114 Drug induced myotonia
- G7119 Other specified myotonic disorders
- G723 Periodic paralysis

## Perinatal

|     |                                                                                              |
|-----|----------------------------------------------------------------------------------------------|
| P00 | Fetus and newborn affected by maternal conditions that may be unrelated to present pregnancy |
| P01 | Fetus and newborn affected by maternal complications of pregnancy                            |
| P02 | Fetus and newborn affected by complications of placenta, cord and membranes                  |
| P03 | Fetus and newborn affected by other complications of labour and delivery                     |
| P04 | Fetus and newborn affected by noxious influences transmitted via placenta or breast milk     |
| P05 | Slow fetal growth and fetal malnutrition                                                     |
| P07 | Disorders related to short gestation and low birth weight, not elsewhere classified          |
| P08 | Disorders related to long gestation and high birth weight                                    |
| P20 | Intrauterine hypoxia                                                                         |
| P21 | Birth asphyxia                                                                               |
| P24 | Neonatal aspiration syndromes                                                                |
| P25 | Interstitial emphysema and related conditions originating in the perinatal period            |
| P26 | Pulmonary haemorrhage originating in the perinatal period                                    |
| P29 | Cardiovascular disorders originating in the perinatal period                                 |
| P50 | Fetal blood loss                                                                             |
| P51 | Umbilical haemorrhage of newborn                                                             |
| P52 | Intracranial nontraumatic haemorrhage of fetus and newborn                                   |
| P53 | Haemorrhagic disease of fetus and newborn                                                    |
| P54 | Other neonatal haemorrhages                                                                  |
| P55 | Haemolytic disease of fetus and newborn                                                      |
| P56 | Hydrops fetalis due to haemolytic disease                                                    |
| P57 | Kernicterus                                                                                  |
| P58 | Neonatal jaundice due to other excessive haemolysis                                          |
| P59 | Neonatal jaundice from other and unspecified causes                                          |
| P60 | Disseminated intravascular coagulation of fetus and newborn                                  |
| P61 | Other perinatal haematological disorders                                                     |
| P70 | Transitory disorders of carbohydrate metabolism specific to fetus and newborn                |
| P71 | Transitory neonatal disorders of calcium and magnesium metabolism                            |
| P72 | Other transitory neonatal endocrine disorders                                                |
| P74 | Other transitory neonatal electrolyte and metabolic disturbances                             |
| P75 | Meconium ileus                                                                               |
| P76 | Other intestinal obstruction of newborn                                                      |
| P77 | Necrotizing enterocolitis of fetus and newborn                                               |
| P78 | Other perinatal digestive system disorders                                                   |
| P80 | Hypothermia of newborn                                                                       |
| P81 | Other disturbances of temperature regulation of newborn                                      |
| P83 | Other conditions of integument specific to fetus and newborn                                 |
| P90 | Convulsions of newborn                                                                       |
| P91 | Other disturbances of cerebral status of newborn                                             |
| P92 | Feeding problems of newborn                                                                  |
| P93 | Reactions and intoxications due to drugs administered to fetus and newborn                   |
| P94 | Disorders of muscle tone of newborn                                                          |
| P95 | Fetal death of unspecified cause                                                             |
| P96 | Other conditions originating in the perinatal period                                         |
